# Supplementary material
Source: PubMed Central journal article supplement (PMC4836986)
Supplement: NIHMS754394-supplement-2.pdf [file NIHMS754394-supplement-2.pdf]

**Supplementary Table 2**

Mathewson et. al. 2016

qPCR Primers

| <b>Probe</b> | <b>Gene Name</b> | <b>Forward</b>           | <b>Reverse</b>            |
|--------------|------------------|--------------------------|---------------------------|
| GAPDH        | <i>Gapdh</i>     | CCACAGTCCATGCCATCACTGC   | GCCCAAGATGCCCTTCAGTGGG    |
| SLC5A8       | <i>Slc5a8</i>    | GCTGGATTTGCATCCGTAAT     | TGGGACTGGTTGACACCATA      |
| GPR43        | <i>Ffar2</i>     | CACGGCCTACATCCTCATCT     | TTGGTAGGTACCAGCGGAAG      |
| p300         | <i>Ep300</i>     | TGCCTCCCATTGTTGATCCT     | ACTCGTTGCAGGTGTAGACA      |
| TIP60        | <i>Kat5</i>      | TGGACGGAAGCGGAAATCTA     | CGGCCAAGCTCAATACACTC      |
| BAK          | <i>Bak1</i>      | CAGATGGATCGCACAGAGAG     | TCTGTGTACCACGAATTGGC      |
| BAX          | <i>Bax</i>       | ACTAAAGTGCCCGAGCTGAT     | ATGGTCACTGTCTGCCATGT      |
| BCL-B        | <i>Bcl2l10</i>   | TCATAGTGACCCGAGACTGC     | TGTTGCAAAGAAGCCTGACA      |
| JAM          | <i>F11r</i>      | ACTGCTCAATCTGACGTCCA     | ATAGGGAGCTGTGATCTGGC      |
| Occludin     | <i>Ocln</i>      | CTCTCAGCCAGCGTACTCTT     | CTCCATAGCCACCTCCGTAG      |
| E-Cadherin   | <i>Cdh1</i>      | CCTGTCTTCAACCCAAGCAC     | CAACAACGAAGCTGCTGGTCA     |
| HDAC1        | <i>Hdac1</i>     | TGGGGCTGGCAAAGGCAAGT     | GACCACTGCACTAGGCTGGAACA   |
| HDAC4        | <i>Hdac4</i>     | AGCTCTGGCAACGTCAGCACT    | AAGTGGGGCGACTGAGCCTTCT    |
| HDAC7        | <i>Hdac7</i>     | GCTCAGCATGTGCATGTGGAACAC | TGAGAGCCTGGTGTGTCTGGCT    |
| HDAC9        | <i>Hdac9</i>     | TGCACCTTTGCCTCAGAGCACG   | TGGCTGCCTGGTTGCTTCAGT     |
| HDAC10       | <i>Hdac10</i>    | TAGCAGCCAAACATGCCAAGCAGA | ATGCTCATAGCGGTGCCAAGAGAAA |
